# Supplementary material for: A bvrR/bvrS Non-Polar Brucella abortus Mutant Confirms the Role of the Two-Component System BvrR/BvrS in Virulence and Membrane Integrity
Source: MDPI journal article supplement (doi:10.3390/microorganisms11082014), 2023-08-05
Supplement: s1 [file s1]

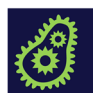

## Supplementary Material

Table S1. List of primers used in this study

| <i>Primer</i>   | <i>Sequence</i>                         |
|-----------------|-----------------------------------------|
| bvrRS-Up-For    | G <u>CCGATCC</u> CAGCACGATCTTGCGGGTAAGA |
| bvrRS-Up-Rev    | CTTCATGCGGACCTTCTCCTTT                  |
| bvrRS-Dn-For    | GCATGACCGTGAAAAGTGGATATC                |
| bvrRS-Dn-Rev    | G <u>CCCTGCAGC</u> ATCACGGAAATGGCCAGATT |
| bvrRS-Con-For   | CGTTTAACCCGAGCGTTCTGG                   |
| bvrRS-Con-Rev   | CATTTGCCGACAATGCCGG                     |
| bvrR_bv1-For    | CATGGACGGTATGGAGCTTCTG                  |
| bvrR_bv1-Rev    | GAGGAAGATGACCGGCAGATC                   |
| bvrRS-South-For | ACCACCCTGCAATTGCTGG                     |
| bvrRS-South-Rev | ATATCGCTCAGCCTCGTCGC                    |
| pckA-For        | GCACGACATTTTCCAGAACC                    |
| pckA-Rev        | TGTGGTGGGACAACAACAAG                    |

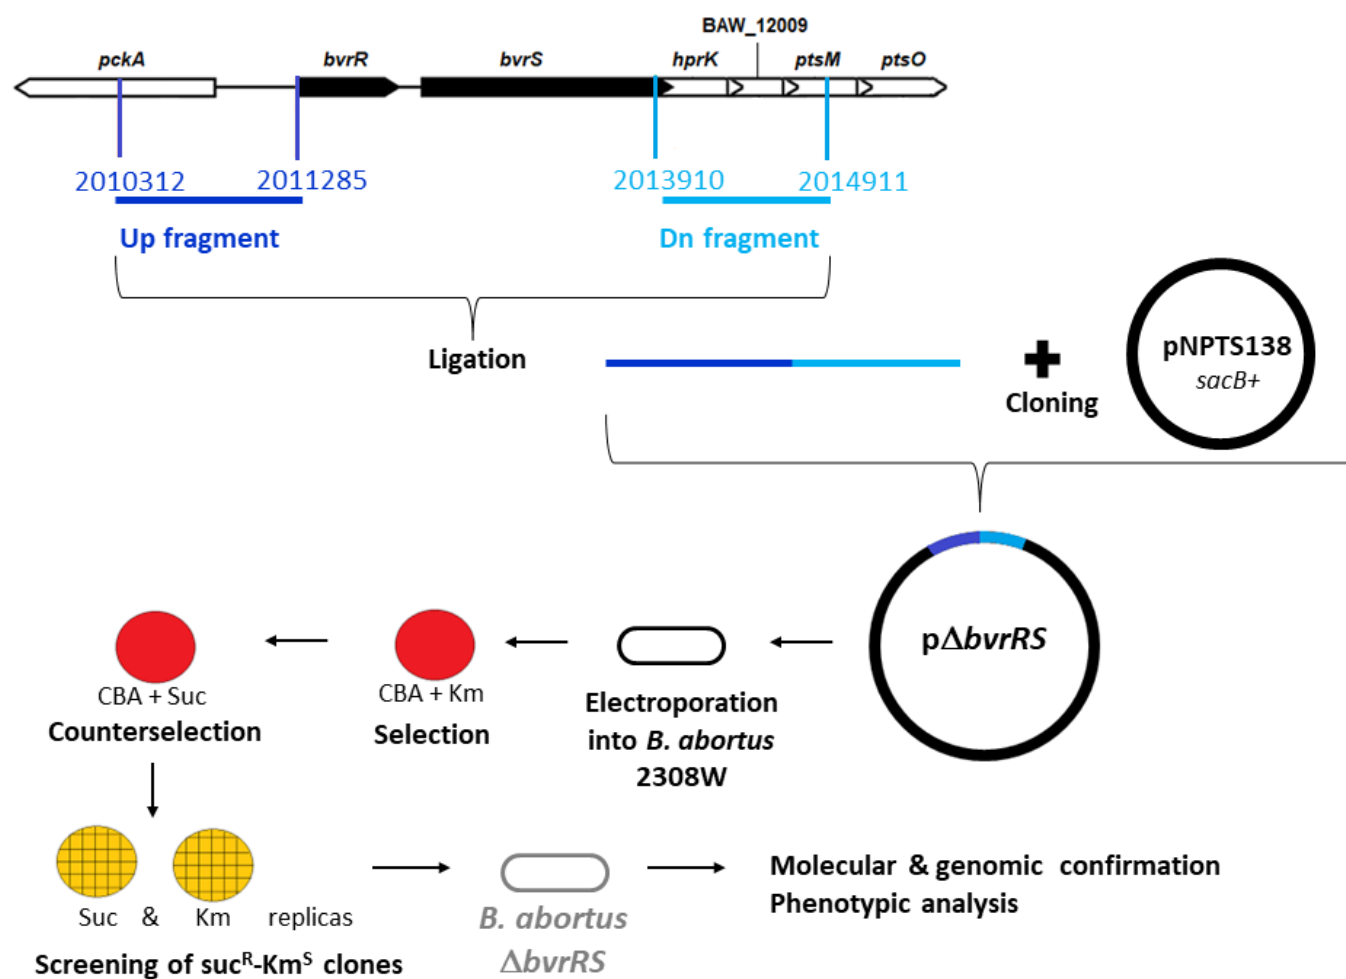

**Figure S1.** Schematic representation of the unmarked gene excision strategy used in this study for the construction of the mutant strain *B. abortus*  $\Delta bvrRS$ . The Up and Dn fragments were amplified, ligated and cloned into pNPTS138, a suicide vector with a kanamycin (km) resistant marker and the gene *sacB* for sucrose (*suc*) counterselection. The resulting plasmid was called p $\Delta bvrRS$  and was electroporated into the parental strain *B. abortus* 2308W. During the counterselection, the construct was integrated into the bacterial chromosome by allelic exchange, resulting in a deletion of *bvrR/bvrS* coding sequences and plasmid loose. The *suc*<sup>R</sup> and Km<sup>S</sup> clones were screened by PCR and the mutation was further confirmed by Southern Blot, DNA Sanger sequencing and Western Blot. Biochemical identification as *Brucella* sp., was also confirmed, and the phenotype of the mutant strain *B. abortus*  $\Delta bvrRS$  was analyzed and compared to the phenotype of both transposon mutants.

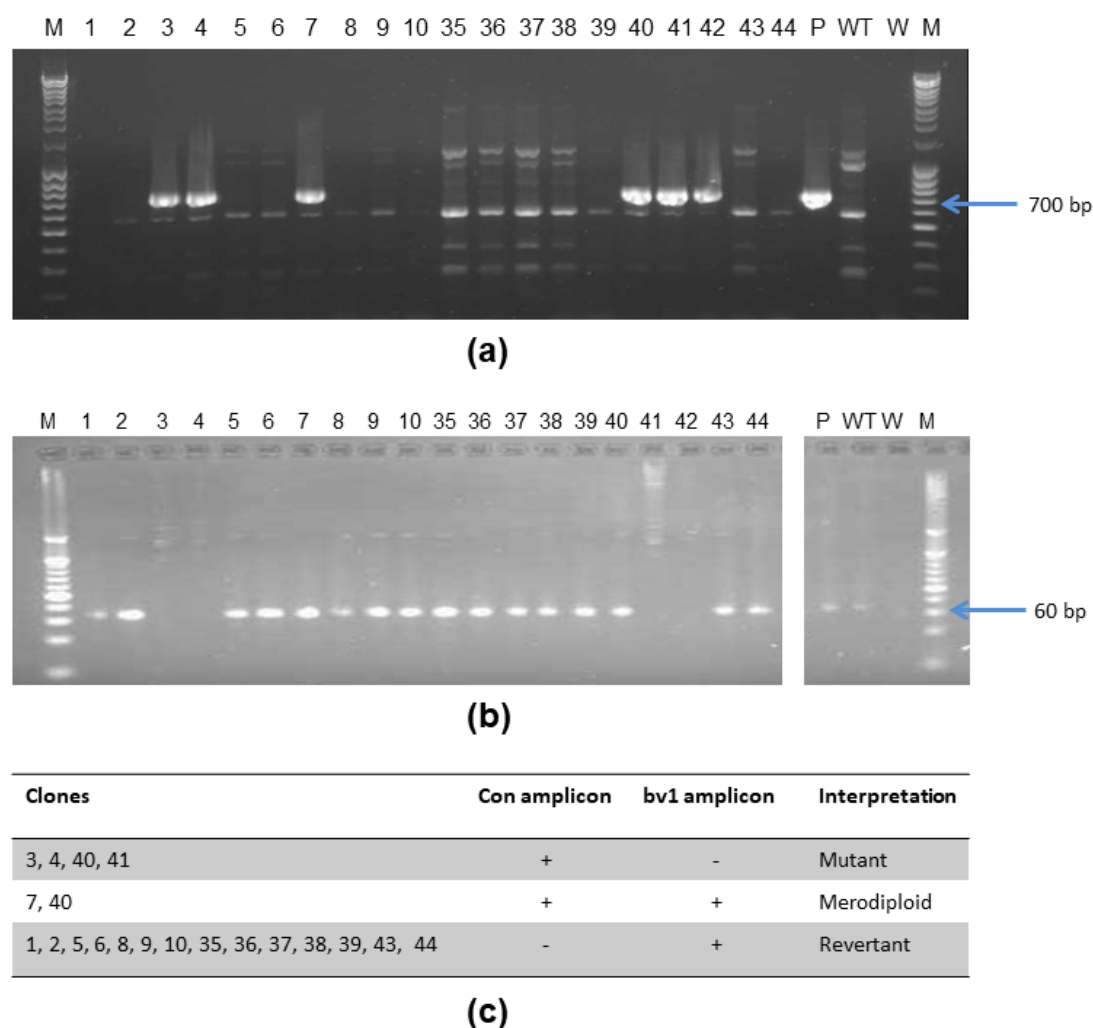

**Figure S2.** PCR screening of Suc<sup>R</sup> y Km<sup>S</sup> clones. (a) PCR results obtained in a reaction with bvrRS-Con primers (Supplementary Table 1), amplifying a 709 bp fragment in the  $\Delta$ bvrRS mutant strain; (b) PCR results obtained in a reaction with bvrR\_bv1 primers (Supplementary Table 1), amplifying a 63 bp internal fragment of *bvrR* coding sequence not expected to be amplified in the  $\Delta$ bvrRS strain. M= Molecular marker MassRuler DNA Ladder Mix, ready-to-use (Thermo Fisher Scientific, USA) or O'RangeRuler 20 bp DNA Ladder, ready-to-use (Thermo Fisher Scientific, USA); P=plasmid p $\Delta$ bvrRS; WT= Wild Type parental strain *B. abortus* 2308W; W= water; (c) Interpretation of the PCR screening. The clones 3, 4, 40 and 41 were considered to harbor the double deletion of the *bvrR/bvrS* genes. The clones 7 and 40 were considered merodiploids and the rest of the clones tested were considered revertant. The results are representative of at least three independent experiments.

**Table S2.** Quality results of *B. abortus* sequencing and whole genome assembly

| Metric               | <i>Brucella abortus</i> 2308W | <i>Brucella abortus</i> $\Delta$ bvrRS |
|----------------------|-------------------------------|----------------------------------------|
| Total no. of reads   | 24,882.0                      | 48,431.0                               |
| Mean read length     | 8,892.1                       | 8,101.2                                |
| Mean read quality    | 13.6                          | 13.6                                   |
| Sequencing depth (×) | 68                            | 121                                    |
| Genome size (bp)     | 3,282,977                     | 3,280,422                              |
| % GC                 | 57,22                         | 57,22                                  |
| No. of contigs       | 2                             | 2                                      |

---

|                                 |                   |                   |
|---------------------------------|-------------------|-------------------|
| N50 (bp)                        | 1,161,874         | 1,161,890         |
| Completeness (%)                | 97.99             | 97.99             |
| Contamination (%)               | 0.71              | 0.79              |
| BioSample accession no.         | SAMN31324765      | SAMN31324766      |
| GenBank WGS accession no.       | CP109916-CP109917 | CP109914-CP109915 |
| SRA accession no. for raw reads | SRR21939256       | SRR21939255       |

---
